# Supplementary material for: A fluorinated carbon nanodot-tube/MXene/microfiber electronic textile with high water-interference-resistance for stable amphibious human motion monitoring
Source: Royal Society of Chemistry journal article supplement (doi:10.1039/d4ta08401b), 2025-01-01
Supplement: d4ta08401b1.pdf [file d4ta08401b1.pdf]

**Fluorinated carbon nanodot-tube/MXene/microfiber electronic  
textile with high water-interference-resistance for stable  
amphibious human motion monitoring**

Yibo Wang<sup>a,b</sup>, Jiansong Lu<sup>a,b</sup>, Guangying Zhang<sup>a,b</sup>, Haoyang Song<sup>a,b</sup>, Yang Cai<sup>a,b</sup>, Ximan Wang<sup>a,b</sup>,  
Hongjia Zhang<sup>a,b</sup>, Feng Fang<sup>c</sup>, Changsheng Liu<sup>a,b</sup>, Yongquan Qing<sup>a,b\*</sup>

<sup>a</sup>School of Materials Science and Engineering, Northeastern University, Shenyang 110819, China

<sup>b</sup>Key Laboratory for Anisotropy and Texture of Materials, Ministry of Education, Northeastern  
University, Shenyang 110819, China

<sup>c</sup>China Textile Standard (Zhejiang) Testing Co., Ltd., Shaoxing 312000, China

**Corresponding author**

\*Dr. Y.Q. Qing: E-mail: qingyq@mail.neu.edu.cn

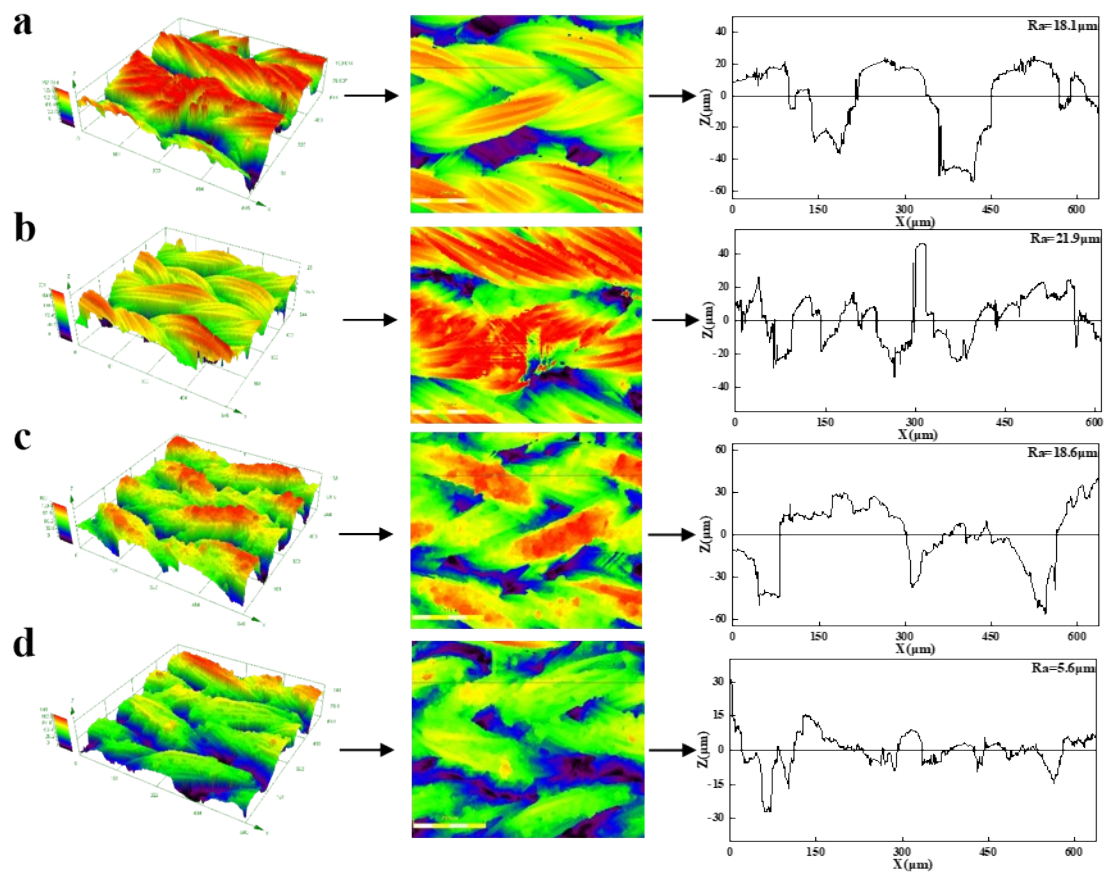

**Fig. S1.** (a) LSCM topographical images of the MXene-textile for direct anti fouling and (b) indirect anti fouling. (c) LSCM topographical images of the FCNET for direct anti-fouling and (d) indirect anti-fouling.

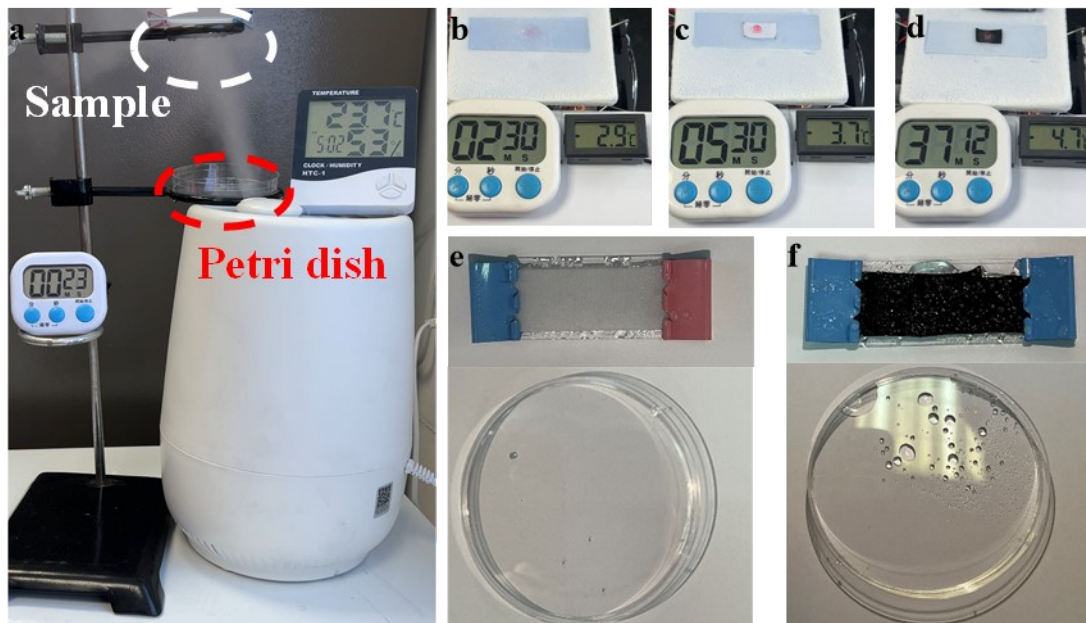

**Fig. S2.** (a) Schematic diagram of condensing device. Photographs of the freezing time of droplets on the surfaces of (b) glass slide, (c) fabric, and (d) FCNET. Surfaces of (e) fabric and (f) FCNET after condensation test, with the culture dish positioned below.

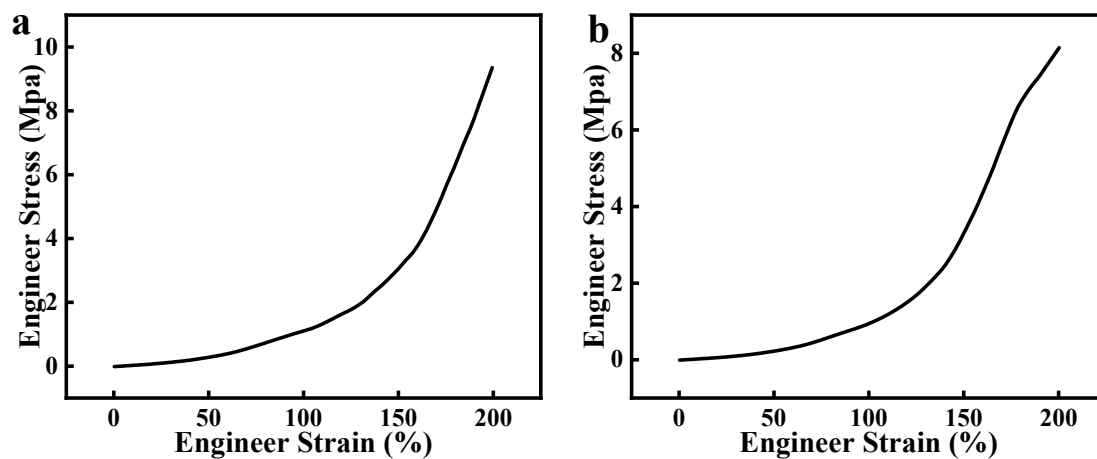

**Fig. S3.** (a) Stress-strain curve of nylon textile. (b) Stress-strain curve of FCNET.

**Table S1** Performance comparison of superhydrophobic flexible sensors.

| <b>Response time</b> | <b>Corrosion resistance</b> | <b>Wear resistance</b>                          | <b>Underwater</b> | <b>Reference</b> |
|----------------------|-----------------------------|-------------------------------------------------|-------------------|------------------|
| 200 ms               | 0.01 M acid contact         | 1000-grit sandpaper with a 100 g weight for 20m | √                 | [19]             |
| 150 ms               | 0.01 M acid soak for 2 h    | 1000-grit sandpaper with a 20 g weight for 16m  | √                 | [20]             |
| none                 | none                        | 1500-grit sandpaper with a 50 g weight for 1m   | √                 | [31]             |
| 151 ms               | 0.001 M acid soak for 6 h   | 800-grit sandpaper with a 10 g weight for 0.8 m | ×                 | [38]             |
| 200 ms               | 0.01 M acid contact         | none                                            | ×                 | [39]             |
| 125 ms               | 0.1 M acid soak for 2 h     | 1000-grit sandpaper with a 50 g weight for 10m  | √                 | Our work         |

## Supplementary Videos

**Movie S1:** Demonstration of various pH values and different types of liquids rolling off the surface.

**Movie S2:** Acidic, alkaline, and saline solutions effectively carry away dust from the sensor surface.
